# Supplementary material
Source: publisher figshare collection journal article supplement (https://acs.figshare.com/ndownloader/files/5516135)
Supplement: Supplementary file 1 [file 5516135]

## Low Temperature Chemical Synthesis of CoWO<sub>4</sub> Nanospheres for Sensitive Non-Enzymatic Glucose Sensor

Mani Sivakumar<sup>†</sup>, Rajesh Madhu<sup>†,‡</sup>, Shen-Ming Chen<sup>†,\*</sup>, Vedyappan Veeramani<sup>†</sup>, Arumugam Manikandan<sup>‡</sup>, Wei Hsuan Hung<sup>++</sup>, Nobuyoshi Miyamoto<sup>‡</sup>, and Yu-Lun Chueh<sup>‡,\*</sup>

<sup>†</sup> Department of Chemical Engineering and Biotechnology, National Taipei University of Technology, Taipei 10608, Taiwan, R.O.C

<sup>‡</sup> Department of Materials Science & Engineering, National Tsing-Hua University, Hsinchu 30013, Taiwan, R.O.C

<sup>‡</sup> Department of Life, Environment, and Materials Science, Fukuoka Institute of Technology, 3-30-1, Wajirohigashi, Higashiku, Fukuoka 811-0295, Japan.

<sup>++</sup> Department of Materials Science and Engineering, Feng Chia University, Taichung 407, Taiwan, R.O.C

\* E-mail: smchen78@ms15.hinet.net and ylchueh@mx.nthu.edu.tw

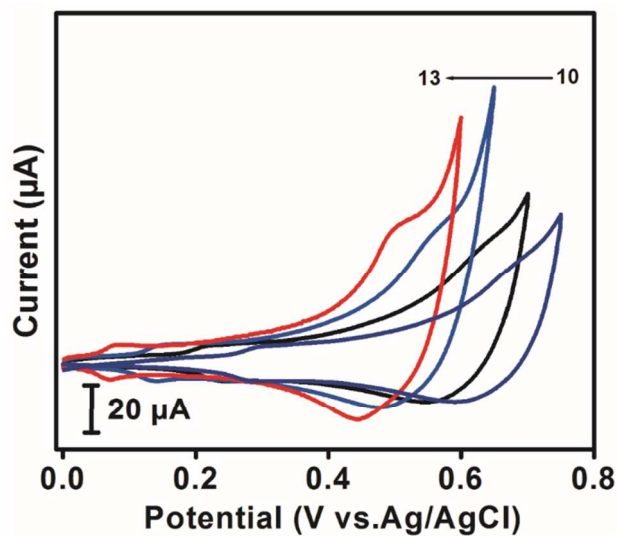

**Figure S1** CV curves of CoWO<sub>4</sub>-2 modified electrodes in the presence of 290 μM glucose with different pH values.

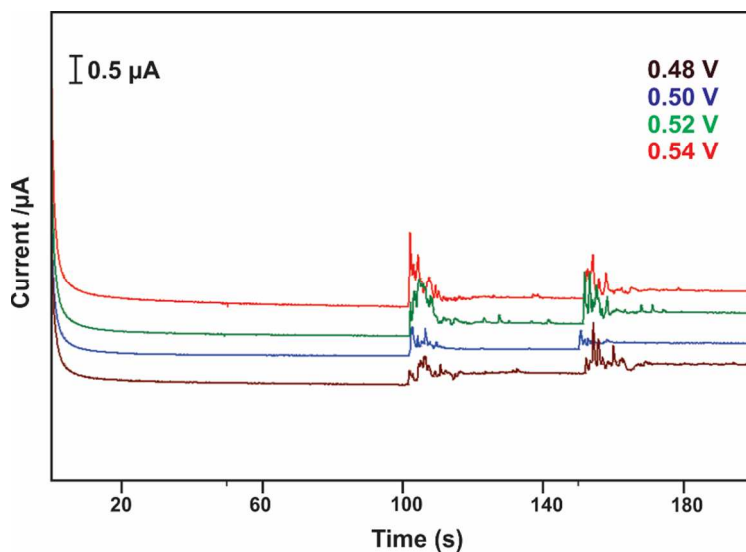

**Figure S2** Amperometry curves for the CoWO<sub>4</sub>-2 modified GCE with different applied potentials in the presence of glucose concentration. Supporting electrolyte: 0.5 M NaOH aqueous solution; applied potential: 0.52 V.

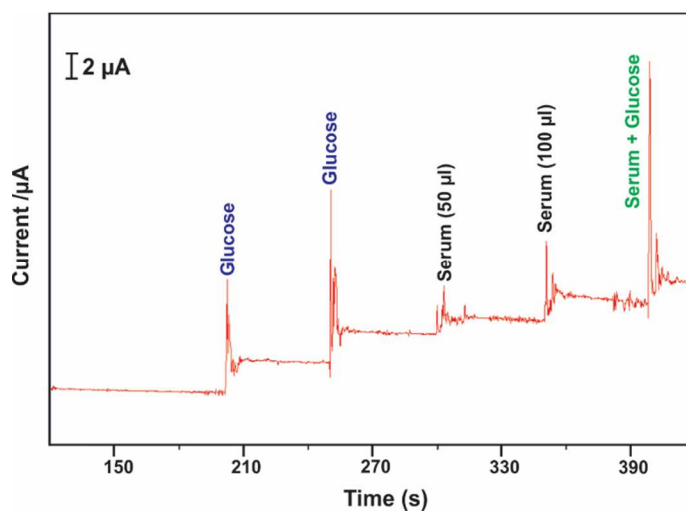

**Figure S3** Real sample analysis for the CoWO<sub>4</sub>-2 modified GCE with glucose (blue), serum (black) and glucose + serum (green) samples. Supporting electrolyte: 0.5 M NaOH aqueous solution; applied potential: 0.52 V.

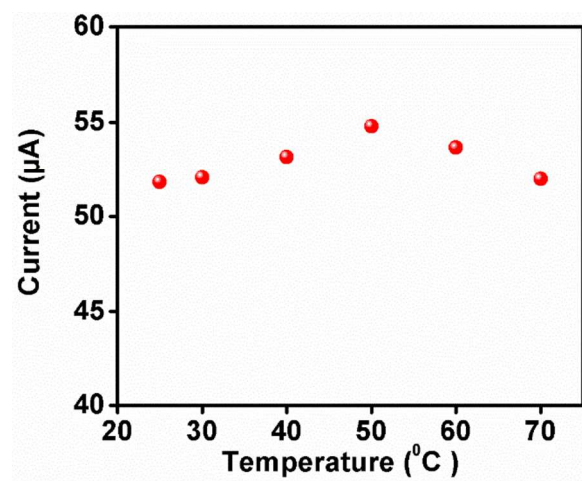

**Figure S4** The peak current vs temperature for CoWO<sub>4</sub>-2 modified GCE in the presence glucose.
